# Supplementary material for: Hydrothermal synthesis, ab-initio structure determination and NMR study of the first mixed Cu–Al fluorinated MOF
Source: Royal Society of Chemistry journal article supplement (doi:10.1039/c3ce40099a), 2013-01-01
Supplement: c3ce40099a.pdf [file c3ce40099a.pdf]

## Hydrothermal synthesis, ab-initio structure determination and NMR study of the first mixed Cu/Al fluorinated MOF.

Amandine Cadiou, Sandy Auguste, Francis Taulelle, Charlotte Martineau, and Karim Adil

Table S1 : Atomic positions and selected bond distance

| Atom | x             | y         | z         | Beq     |
|------|---------------|-----------|-----------|---------|
| Cu   | 0             | 0         | 0         | 1.47(6) |
| Al   | $\frac{3}{4}$ | 0.0646(7) | 0.0182(2) | 3.0(2)  |
| Fa   | $\frac{3}{4}$ | 0.0691(1) | 0.8022(2) | 1.83(1) |
| Fb   | 0.6393(2)     | 0.0634(6) | 0.9814(1) | 1.83(1) |
| Fd   | $\frac{3}{4}$ | 0.8639(7) | 0.0232(2) | 1.83(1) |
| Fc   | $\frac{3}{4}$ | 0.0806(1) | 0.2352(2) | 1.83(1) |
| O    | $\frac{3}{4}$ | 0.2851(1) | 0.0250(2) | 1.83(1) |
| C1   | 0.10205       | 0.23140   | 0.15310   | 4.0(2)  |
| C2   | -0.01221      | 0.22358   | 0.28127   | 4.0(2)  |
| N3   | 0.10362       | 0.34133   | 0.25426   | 4.0(2)  |
| N4   | 0.03049       | 0.33755   | 0.33885   | 4.0(2)  |
| N5   | 0.03114       | 0.15419   | 0.16461   | 4.0(2)  |
| N6   | -0.08859      | 0.18580   | 0.32656   | 4.0(2)  |
| H7   | -0.11366      | 0.23768   | 0.39875   | 8.10(1) |
| H8   | -0.11235      | 0.10984   | 0.28330   | 8.10(1) |
| H9   | 0.14269       | 0.40480   | 0.26689   | 8.10(1) |
| H10  | 0.14417       | 0.20848   | 0.08177   | 8.10(1) |

|       |           |       |           |
|-------|-----------|-------|-----------|
| Cu-N4 | 2.0345    | Al-FB | 1.8339(2) |
| Cu-N5 | 2.0046    | Al-FD | 1.7927(2) |
| Cu-FB | 2.3488(2) | Al-FC | 1.8042(2) |
| Al-FA | 1.7912(2) | Al-O  | 1.9709(2) |

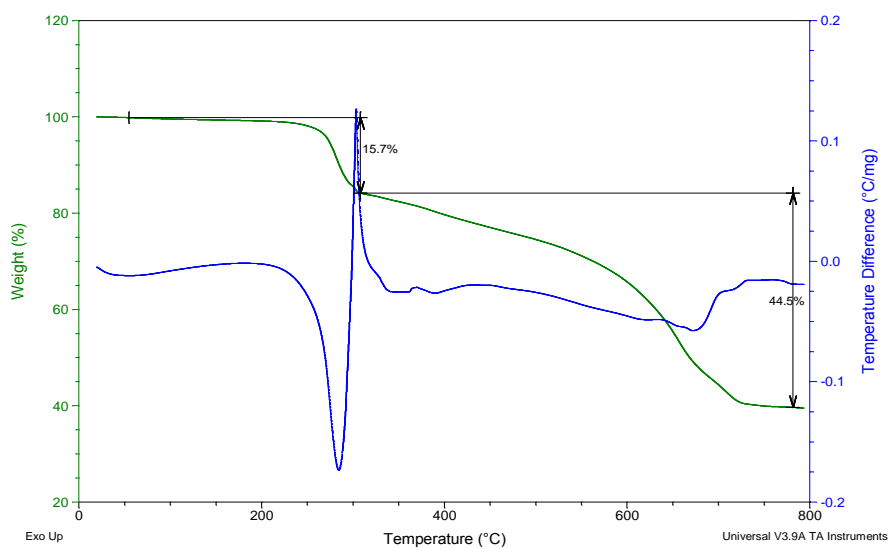

Fig. S1. Thermal analysis of  $\text{CuAlF}_5(\text{H}_2\text{O})[\text{HAMTAZ}]_2$  under argon.

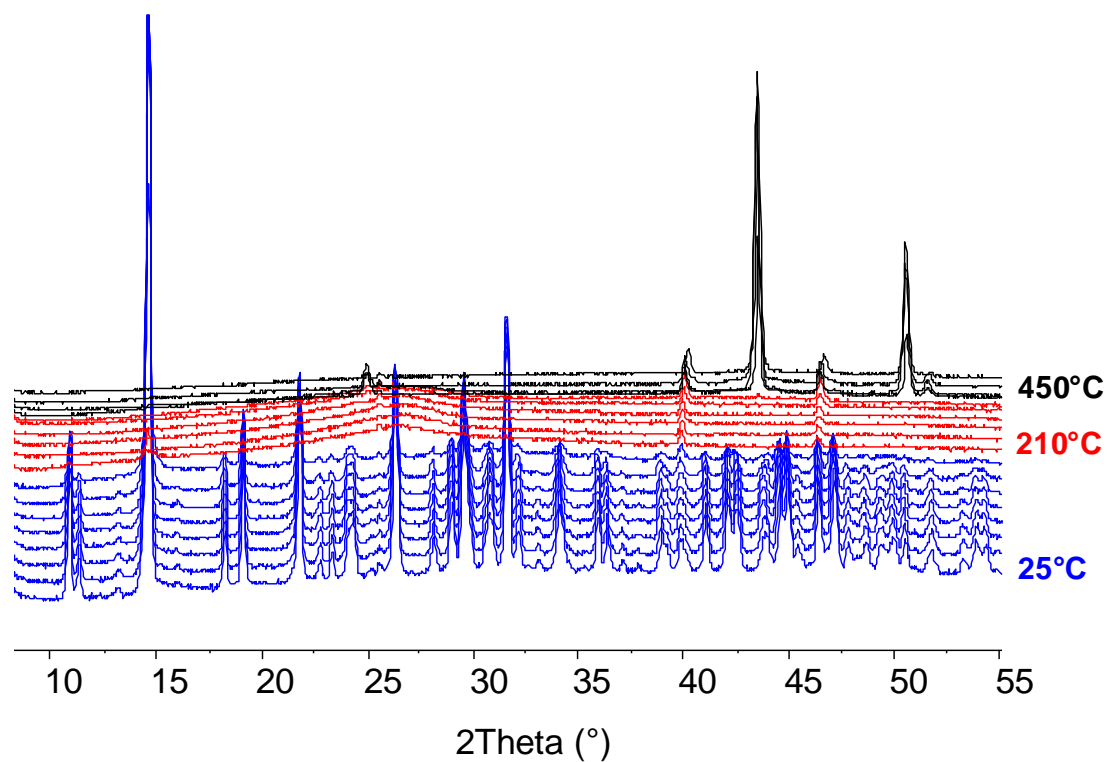

Fig. S2. Thermodiffraction of  $\text{CuAlF}_5(\text{H}_2\text{O})[\text{HAMTAZ}]_2$  under nitrogen.

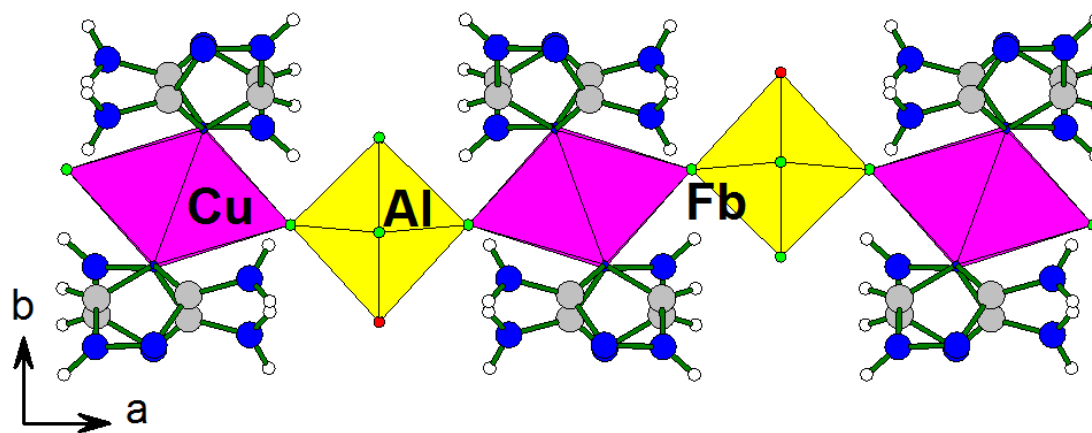

Fig. S3.  $\text{CuN}_4\text{F}_2$  and  $\text{AlF}_5\text{H}_2\text{O}$  distorted octahedra *trans*-connected leading to inorganic chains along the  $a$  axis. Hydrogens are omitted for clarity.

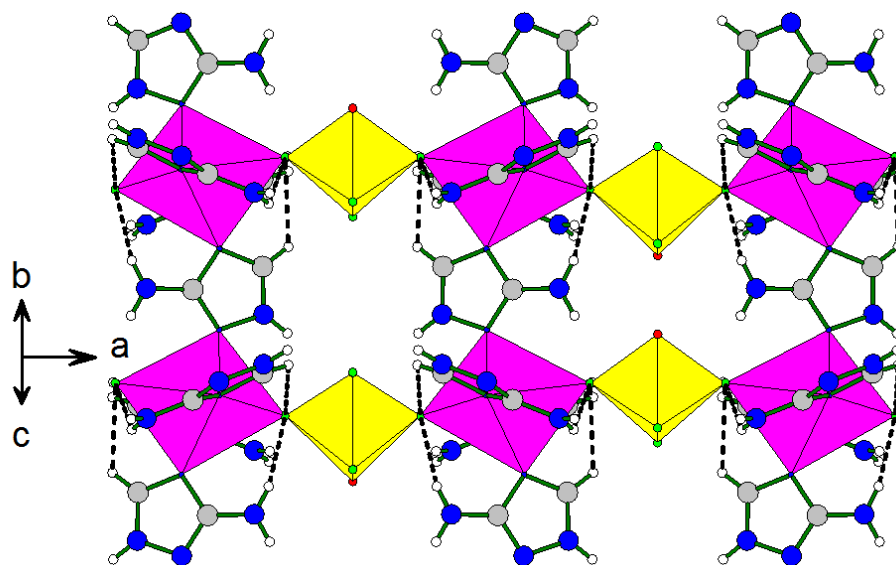

Fig. S4. Hydrogen bonds.

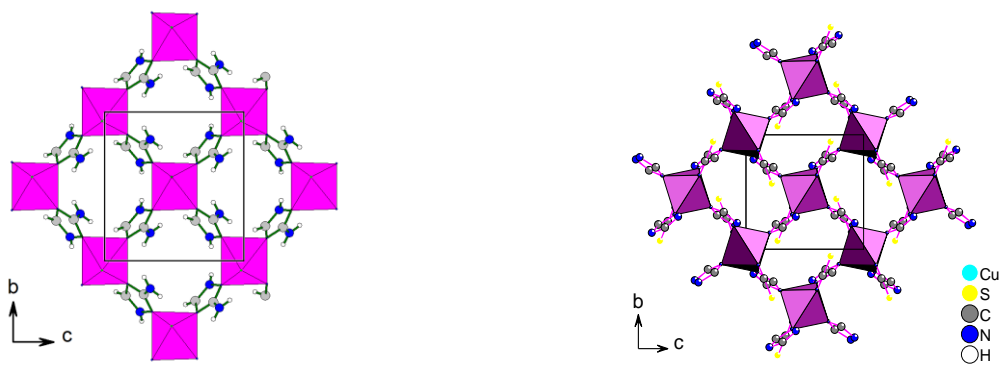

Fig. S5. Layer of  $\text{CuAlF}_5(\text{H}_2\text{O})[\text{HAMTAZ}]_2$  (left) and  $\text{Cu}(\text{TAZ})_2(\text{NCS})_2$  (right). Hydrogens are omitted for clarity.

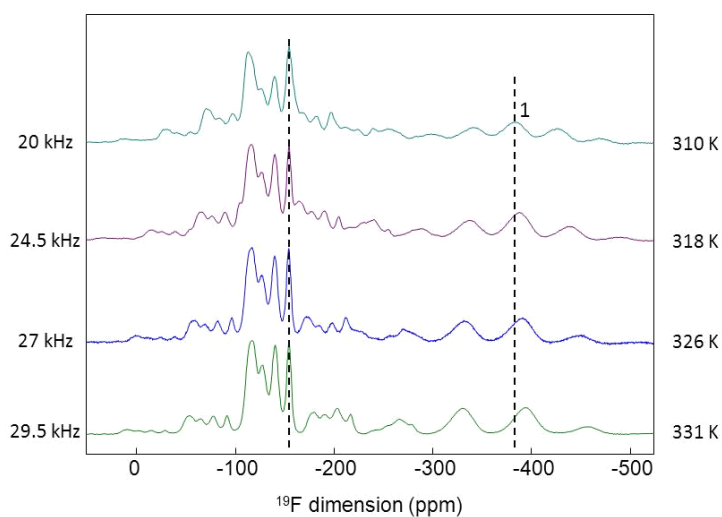

Fig. S6.  $^{19}\text{F}$  MAS NMR spectra of  $\text{CuAlF}_{4.5}(\text{OH})_{0.5}(\text{H}_2\text{O})[\text{HAMTAZ}]_2$  recorded at various MAS frequencies. The dash lines are a guide for the eye. Temperature of the sample at these MAS frequencies was calibrated using the  $^{207}\text{Pb}$  chemical shift in solid lead nitrate.

**Table S2.**  $^1\text{H}$  and  $^{19}\text{F}$  line label, line intensity (%), isotropic chemical shift  $\delta_{\text{iso}}$  (ppm), chemical shift anisotropy  $\delta_{\text{CS}}$  (ppm) and asymmetry parameter  $\eta_{\text{CS}}$  in  $\text{CuAlF}_5(\text{H}_2\text{O})[\text{AmTAZ}]_2$ .

| Line            | Intensity<br>( $\pm 0.5$ ) | $\delta_{\text{iso}}$<br>( $\pm 0.5$ ) | $\delta_{\text{CS}}$<br>( $\pm 1$ ) | $\eta_{\text{CS}}$<br>( $\pm 0.1$ ) |
|-----------------|----------------------------|----------------------------------------|-------------------------------------|-------------------------------------|
| $^1\text{H}$    |                            |                                        |                                     |                                     |
| 1               | 42.1                       | 1.9                                    | 100                                 | 0.0                                 |
| 2               | 39.3                       | 12.5                                   | 95                                  | 0.8                                 |
| 3               | 18.6                       | 45.5                                   | 107                                 | 0.5                                 |
| $^{19}\text{F}$ |                            |                                        |                                     |                                     |
| 1               | 31.7                       | -456.4                                 |                                     |                                     |
| 2               | 11.9                       | -154.2                                 | 95                                  | 0.7                                 |
| 3               | 18.1                       | -140.3                                 | 107                                 | 0.4                                 |
| 4               | 15.8                       | -127.4                                 | 105                                 | 0.7                                 |
| 5               | 9.0                        | -118.8                                 | 93                                  | 0.9                                 |
| 6               | 13.5                       | -113.4                                 | 93                                  | 0.9                                 |

-
